# Supplementary material
Source: HighWire-hosted journal article supplement (https://jnm.snmjournals.org/highwire/filestream/95202/field_highwire_adjunct_files/0/198440_Supplemental_Data.pdf)
Supplement: 198440_Supplemental_Data.pdf [file 198440_Supplemental_Data.pdf]

**Supplemental Table 1. GEO omnibus datasets included in the study**

| profiling performed, year | GSE Accession number | normal pancreatic tissue | pancreatic cancer tissue |
|---------------------------|----------------------|--------------------------|--------------------------|
| Walker et al (2004)       | GSE1133              | 2                        | 0                        |
| Buturovic et al (2008)    | GSE12630             | 0                        | 9                        |
| Badea et al (2009)        | GSE15471             | 39                       | 39                       |
| Sadanandam et al (2009)   | GSE17891             | 0                        | 1                        |
| Miya et al (2009)         | GSE18674             | 1                        | 0                        |
| Chelala et al (2009)      | GSE19279             | 3                        | 9                        |
| Hiraoka et al (2009)      | GSE19650             | 7                        | 0                        |
| Curley et al (2004)       | GSE2109              | 0                        | 16                       |
| Chen et al (2010)         | GSE22780             | 8                        | 0                        |
| Ge et al (2005)           | GSE2361              | 1                        | 0                        |
| Tran et al (2011)         | GSE32676             | 7                        | 25                       |
| Miya et al (2011)         | GSE33846             | 1                        | 0                        |
| Chelala et al (2013)      | GSE43288             | 3                        | 4                        |
| Kaneda et al (2013)       | GSE43346             | 1                        | 0                        |
| Blais et al (2013)        | GSE46385             | 3                        | 0                        |
| Roth et al (2007)         | GSE7307              | 1                        | 0                        |

Abbreviation: GSE, gene expression omnibus series; PDA, pancreatic ductal adenocarcinoma

Note: GSE accession numbers can be used to query the data set in GEO (<http://www.ncbi.nlm.nih.gov/geo/>).

**Supplemental Table 2. Literature overview protein overexpression human samples**

| Rank | Gene symbol        | Protein location | Protein function       | Protein overexpression in human samples |               |        | Reference                                                                       |
|------|--------------------|------------------|------------------------|-----------------------------------------|---------------|--------|---------------------------------------------------------------------------------|
|      |                    |                  |                        | PDA                                     | other cancers | unkown |                                                                                 |
| 1    | THY1               | cell membrane    | Glycolipid             | ●                                       |               |        | Foygel <i>et al</i> , 2013)                                                     |
| 2    | SEL1L              | intracellular    | unkown                 | ●                                       |               |        | Cattaneo <i>et al</i> , 2003                                                    |
| 3    | NPR3               | Cell membrane    | GPCR                   |                                         |               | ●      |                                                                                 |
| 4    | JUP /// KRT17      | intracellular    | cytokeratin            |                                         | ●             |        | Escobar-Hoyos <i>et al</i> , 2014                                               |
| 5    | NOX4               | cell membrane    | NADPH oxidase          | ●                                       |               |        | Edderkaoui <i>et al</i> , 2005;<br>Ogrunc <i>et al</i> , 2014                   |
| 6    | TM4SF1             | cell membrane    | Antigen                | ●                                       |               |        | Lin <i>et al</i> , 2014                                                         |
| 7    | CLDN18             | cell membrane    | Tight junction protein | ●                                       |               |        | Tanaka <i>et al</i> , 2011; Wöll <i>et al</i> , 2014; Soini <i>et al</i> , 2012 |
| 8    | CTSE               | intracellular    | Protease               | ●                                       |               |        | Keliher <i>et al</i> , 2013                                                     |
| 9    | TMPRSS4            | cell membrane    | Protease               | ●                                       |               |        | Wallrapp <i>et al</i> , 2000                                                    |
| 10   | GGT5               | extracellular    | Protease               | ●                                       |               |        | Ramsay <i>et al</i> , 2014                                                      |
| 11   | DKK3               | extracellular    | unknown                | ●                                       |               |        | Fong <i>et al</i> , 2009;<br>Uchida <i>et al</i> , 2014                         |
| 12   | TINAGL1            | extracellular    | Glycoprotein           |                                         |               | ●      |                                                                                 |
| 13   | LAMA3              | extracellular    | Laminin                |                                         |               | ●      |                                                                                 |
| 14   | HSD17B7            | cell membrane    | SDR                    |                                         |               | ●      |                                                                                 |
| 15   | AHNAK2             | intracellular    | Unkown                 |                                         |               | ●      |                                                                                 |
| 16   | FXYD3              | cell membrane    | Ion channel regulator  | ●                                       |               |        | Kayed <i>et al</i> , 2006                                                       |
| 17   | C7orf10            | intracellular    | Transferase            |                                         |               | ●      |                                                                                 |
| 18   | GJB3               | cell membrane    | Gap junction protein   |                                         |               | ●      |                                                                                 |
| 19   | GPRC5D             | cell membrane    | GPCR                   |                                         |               | ●      |                                                                                 |
| 20   | LAMC2              | extracellular    | Laminin                | ●                                       |               |        | Garg <i>et al</i> , 2014;<br>Katayama <i>et al</i> , 2005                       |
| 21   | MTMR11             | intracellular    | Phosphatase            |                                         |               | ●      |                                                                                 |
| 22   | LRRC32             | cell membrane    | unknown                |                                         |               | ●      |                                                                                 |
| 23   | HIST2H2AA3 /// HIS | intracellular    | Nucleosome             |                                         |               | ●      |                                                                                 |
| 24   | LIF                | cell membrane    | Growth factor          | ●                                       |               |        | Peng <i>et al</i> , 2014                                                        |
| 25   | CST2               | extracellular    | Protease inhibitor     |                                         |               | ●      |                                                                                 |
| 26   | CPB1               | intracellular    | Protease               |                                         |               | ●      |                                                                                 |
| 27   | DCLRE1A            | Intracellular    | DNA repair gene        |                                         |               | ●      |                                                                                 |
| 28   | ADAP1              | intracellular    | unkown                 |                                         |               | ●      |                                                                                 |
| 29   | PLA2G16            | intracellular    | Phospholipase          |                                         | ●             |        | Nazarenko <i>et al</i> , 2006;<br>Liang <i>et al</i> , 2015                     |
| 30   | MAP4K4             | Intracellular    | Kinase                 | ●                                       |               |        | Liang <i>et al</i> , 2008                                                       |
| 31   | HOPX *             | nucleus          | unknown                |                                         |               |        | Waraya <i>et al</i> , 2012                                                      |
| 32   | ARL14              | intracellular    | Ribosylation Factor    |                                         |               | ●      |                                                                                 |
| 33   | TP73-AS1           | intracellular    | Transcription factor   |                                         |               | ●      |                                                                                 |
| 34   | CYP3A5             | intacellular     | Cytochrome p450        |                                         |               | ●      |                                                                                 |
| 35   | TRIM29             | intracellular    | Transcription factor   | ●                                       |               |        | Sun <i>et al</i> , 2014                                                         |
| 36   | DNAJB9             | intracellular    | J protein              |                                         |               | ●      |                                                                                 |
| 37   | CAPRN2             | intracellular    | unknown                |                                         |               | ●      |                                                                                 |
| 38   | TRAK1              | intracellular    | Transporter            |                                         | ●             |        | An <i>et al</i> , 2011                                                          |
| 39   | MRC1               | cell membrane    | Receptor               |                                         |               | ●      |                                                                                 |
| 40   | LOC100653217 ///   | cell membrane    | Cell adhesion molecule |                                         |               | ●      |                                                                                 |
| 41   | MUC1               | cell membrane    | Glycoprotein           | ●                                       |               |        | Wang <i>et al</i> , 2014                                                        |

| <b>Supplemental Table 3. Therapeutical targets for pancreatic cancer treatment</b>         |                                         |                                          |              |                                                      |                                                 |
|--------------------------------------------------------------------------------------------|-----------------------------------------|------------------------------------------|--------------|------------------------------------------------------|-------------------------------------------------|
| <b>Antineoplastic drug</b>                                                                 | <b>Therapy type</b>                     | <b>Study population</b>                  | <b>Phase</b> | <b>Conclusion / status study</b>                     | <b>Reference / clinicaltrial.gov identifier</b> |
| <b>Subcategory 1. Targets in pancreatic cancer clinical trials</b>                         |                                         |                                          |              |                                                      |                                                 |
| <b>MUC1, rank 41</b>                                                                       |                                         |                                          |              |                                                      |                                                 |
| MUC1 100mer peptide with SB-AS2 adjuvant                                                   | cancer vaccine                          | unresectable PDA                         | I            | feasible                                             | Ramanathan <i>et al</i> , 2005; NCT00008099     |
| MUC1 100mer peptide                                                                        | cancer vaccine                          | unresectable PDA                         | I            | 1/6 SD                                               | Yamamoto <i>et al</i> , 2005                    |
| MUC1-DC and MUC1-CTL                                                                       | adoptive immunotherapy                  | unresectable PDA                         | I            | 1/20 CR<br>5/20 SD                                   | Kondo <i>et al</i> , 2008                       |
| MUC1-DC                                                                                    | adoptive immunotherapy                  | Advanced PDA                             | I            | 7/7 PD                                               | Rong <i>et al</i> , 2012                        |
| 90Y-hPAM4                                                                                  | radio-immunotherapy                     | Advanced PDA                             | I/II         | 6/38 PR<br>16/38 SD                                  | Ocean <i>et al</i> , 2012; NCT00603863          |
| Falimarev (fowlpox-CEA-MUC-1-TRICOM vaccine) Inalimarev (vaccinia-CEA-MUC1-TRICOM vaccine) | cancer vaccine                          | unresectable PDA                         | I            | recruiting                                           | NCT00669734                                     |
| anti-MUC1 CAR T Cells                                                                      | immunotherapy                           | advanced, refractory solid tumors        | I/II         | recruiting                                           | NCT02587689                                     |
| anti-MUC1 CAR-pNK cells                                                                    | immunotherapy                           | Relapsed or Refractory Solid Tumor       | I/II         | recruiting                                           | NCT02839954                                     |
| <b>NQO1, rank 53</b>                                                                       |                                         |                                          |              |                                                      |                                                 |
| Apaziquone                                                                                 | bio-reductive prodrug activated by NQO1 | Pancreatic cancer first line             | II           | Antitumour activity was not observed.                | Dirix <i>et al</i> , 1996                       |
| <b>PSEN2, rank 54</b>                                                                      |                                         |                                          |              |                                                      |                                                 |
| MK-0752                                                                                    | NOTCH inhibitor                         | unresectable PDA                         | I            | completed no results yet                             | NCT01098344                                     |
| <b>TNFSF11, rank 57</b>                                                                    |                                         |                                          |              |                                                      |                                                 |
| Lenalidomide                                                                               | immunotherapy                           | metastatic PDA                           | II           | PR: 8/72<br>SD: 26/72<br>PD: 22/72<br>MOS 4.7 months | Infante <i>et al</i> , 2013                     |
| <b>ITGB5, rank 65</b>                                                                      |                                         |                                          |              |                                                      |                                                 |
| Cilengitide                                                                                | anti-angiogenic therapy                 | unresectable PDA                         | II           | C+G MOS: 6.7 months<br>gemcitabine MOS: 7.7 months   | Friess <i>et al</i> , 2006                      |
| <b>MSLN, rank 110</b>                                                                      |                                         |                                          |              |                                                      |                                                 |
| BAY94-9343                                                                                 | antibody drug conjugate                 | advanced, refractory solid tumors        | I            | recruiting                                           | NCT02485119                                     |
| BMS-986148                                                                                 | antibody drug conjugate                 | mesothelin positive pancreatic cancer    | I            | recruiting                                           | NCT02341625                                     |
| CART-meso                                                                                  | immunotoxin                             | metastatic mesothelin expressing cancers | I/II         | recruiting                                           | NCT01583686                                     |

|                                      |                                        |                                       |      |                                                                 |                                |
|--------------------------------------|----------------------------------------|---------------------------------------|------|-----------------------------------------------------------------|--------------------------------|
| CART-meso                            | immunotoxin                            | Mesothelin expressing cancers         | I    | recruiting                                                      | NCT02159716                    |
| CART-meso                            | immunotoxin                            | metastatic PDA                        | I    | recruiting                                                      | NCT02465983                    |
| CART-meso                            | immunotoxin                            | metastatic PDA                        | I    | safe and feasible                                               | Beatty <i>et al</i> , 2014     |
| CART-meso                            | immunotoxin                            | Metastatic                            | I/II | recruiting                                                      | NCT02959151                    |
| CART-meso                            | immunotoxin                            | PDA                                   |      |                                                                 |                                |
| CART-meso                            | immunotoxin                            | PDA                                   | I    | recruiting                                                      | NCT02706782                    |
| SS1P(dsFv)-PE38                      | immunotoxin                            | unresectable or metastatic PDA        | I/II | recruiting                                                      | NCT01362790                    |
| SS1P(dsFv)-PE39                      | immunotoxin                            | Mesothelin expressing cancers         | I    | SS1p is well tolerated                                          | Hassan <i>et al</i> , 2007     |
| SS1P(dsFv)-PE40                      | immunotoxin                            | mesothelin expressing cancers         | I    | SS1p is well tolerated                                          | Kreitman <i>et al</i> , 2009   |
| Morab-009 (amatuximab)               | antibody                               | mesothelin expressing cancers         | I    | safe and feasible                                               | Hassan <i>et al</i> , 2010     |
| Morab-009 (amatuximab)               | antibody                               | unresectable PDA                      | II   | completed, no article published yet                             | NCT00570713                    |
| GVAX (GM-CSF)                        | immunotherapy                          | Advanced PDA                          | I    | safe and feasible                                               | Laheru <i>et al</i> , 2008     |
| GVAX (GM-CSF)                        | immunotherapy                          | PDA, adjuvant;                        | II   | PD: 17/60<br>MOS: 24.8 months                                   | Lutz <i>et al</i> , 2011       |
| ANZ-100 and CRS-207                  | cancer vaccine                         | metastatic PDA                        | I    | Safe and feasible<br>OS: 3/7 > 15months                         | Le <i>et al</i> , 2012         |
| GVAX and CRS-207                     | cancer vaccine                         | metastatic PDA                        | II   | cy/GVAX and CRS-207: OS 9.7 months<br>cy/GVAX: OS 4.6 months    | Le <i>et al</i> , 2015         |
| LMB-100 + Nab-Paclitaxel             | Immunotoxin combined with chemotherapy | Pancreatic Neoplasms                  | I/II | recruiting                                                      | NCT02810418                    |
| Anetumab ravtansine                  | Antibody drug conjugate                | Pretreated Advanced Pancreatic Cancer | II   | not yet recruiting                                              | NCT03023722                    |
| <b>SLC2A1, rank 154</b>              |                                        |                                       |      |                                                                 |                                |
| Glufosfamide vs F-5U                 | chemotherapy                           | metastatic PDA                        | III  | recruiting                                                      | NCT01954992                    |
| Glufosfamide                         | chemotherapy                           | Advanced PDA                          | II   | PR: 2/34<br>SD: 11/35<br>MOS: 5.3 months                        | Briasoulis <i>et al</i> , 2003 |
| Glufosfamide + gemcitabine           | chemotherapy                           | metastatic PDA                        | II   | PR: 5/28<br>SD: 11/28<br>MOS: 6 months                          | Chiorean <i>et al</i> , 2010   |
| Glufosfamide vs best supportive care | chemotherapy                           | metastatic PDA                        | III  | MOS glufosfamide: 105 days<br>MOS best supportive care: 84 days | Ciuleanu <i>et al</i> , 2009   |

| <b>PLK3, rank 148</b>                                                  |                                      |                                                   |     |                                                                                             |                              |
|------------------------------------------------------------------------|--------------------------------------|---------------------------------------------------|-----|---------------------------------------------------------------------------------------------|------------------------------|
| BI 2536                                                                | Polo-like kinase inhibitor           | unresectable advanced PDA                         | II  | PR: 2/79<br>SD: 19/79<br>MOS: 149 days                                                      | Mross <i>et al</i> , 2012    |
| <b>TPSAB1, rank 184</b>                                                |                                      |                                                   |     |                                                                                             |                              |
| nafamostat + gemcitabine                                               | protease inhibitor + chemotherapy    | advanced or metastatic PDA                        | I   | PR: 3/12<br>SD: 7/12<br>PD: 2/7                                                             | Uwagawa <i>et al</i> , 2009  |
| nafamostat + gemcitabine                                               | protease inhibitor + chemotherapy    | unresectable advanced or metastatic PDA           | II  | PR: 6/35<br>SD: 25/34<br>PD: 4/35<br>MOS: 10 months                                         | Uwagawa <i>et al</i> , 2013  |
| <b>MMP11, rank 166</b>                                                 |                                      |                                                   |     |                                                                                             |                              |
| marimastat vs gemcitabine                                              | MMP inhibitor + chemotherapy         | unresectable advanced or metastatic PDA           | III | MOS gemcitabine: 167 days<br>MOS 25mg: 125 days<br>MOS 10mg: 105 days<br>MOS 5 mg: 110 days | Bramhall <i>et al</i> , 2001 |
| <b>MMP28, rank 199</b>                                                 |                                      |                                                   |     |                                                                                             |                              |
| marimastat                                                             | MMP inhibitor                        | Advanced PDA                                      | II  | SD: 41/83 in 28 day study period<br>PD: 42/83 in 28 day study period<br>MOS: 113 days       | Bramhall <i>et al</i> , 2002 |
| <b>Subcategory 2. Targets in clinical trials in other cancer types</b> |                                      |                                                   |     |                                                                                             |                              |
| <b>MST1R, rank 95</b>                                                  |                                      |                                                   |     |                                                                                             |                              |
| Foretinib                                                              | small-molecule multikinase inhibitor | advanced or metastatic gastric adenocarcinoma     | II  | PR: 0/69<br>SD: 15/65<br>lack of efficacy                                                   | Shah <i>et al</i> , 2013     |
| Foretinib                                                              | small-molecule multikinase inhibitor | papillary renal cell carcinoma                    | II  | ORR: 13.5%<br>MPFS: 9.3 month                                                               | Choueiri <i>et al</i> , 2013 |
| MGCD265                                                                | Tyrosine kinase inhibitor            | Advanced metastatic or unresectable malignancy    | I   | recruiting                                                                                  | NCT00697632                  |
| MGCD266                                                                | Tyrosine kinase inhibitor            | advanced or metastatic non-small cell lung cancer | II  | recruiting                                                                                  | NCT02544633                  |
| <b>PTMA, rank 106</b>                                                  |                                      |                                                   |     |                                                                                             |                              |
| Thymalfasin / Thymosin 1 / ( T-alfa-1)                                 | Immunomodulatory polypeptide         | metastatic esophageal cancer                      | II  | not yet recruiting                                                                          | NCT02545751                  |
| Thymalfasin / Thymosin 1 / ( T-alfa-1)                                 | Immunomodulatory polypeptide         | metastatic small cell lung cancer                 | II  | not yet recruiting                                                                          | NCT02542137                  |

|                                                                                         |                                |                                       |    |                                                                                                                                           |                                  |
|-----------------------------------------------------------------------------------------|--------------------------------|---------------------------------------|----|-------------------------------------------------------------------------------------------------------------------------------------------|----------------------------------|
| Thymalfasin / Thymosin 1 / ( T-alfa-1)                                                  | Immunomodulatory polypeptide   | metastatic non small cell lung cancer | II | not yet recruiting                                                                                                                        | NCT02542930                      |
| Thymalfasin / Thymosin 1 / ( T-alfa-1)                                                  | Immunomodulatory polypeptide   | metastatic colon cancer               | II | not yet recruiting                                                                                                                        | NCT02535988                      |
| Thymalfasin / Thymosin 1 / ( T-alfa-1)                                                  | Immunomodulatory polypeptide   | hepatocellular carcinoma              | IV | not yet recruiting                                                                                                                        | NCT02281266                      |
| Thymalfasin / Thymosin 1 / ( T-alfa-1)                                                  | Immunomodulatory polypeptide   | metastatic melanoma patients          | I  | MOS: 9.4 months vs. 6.6 months                                                                                                            | Maio <i>et al</i> , 2010         |
| <b>PRLR, rank 213</b>                                                                   |                                |                                       |    |                                                                                                                                           |                                  |
| prolanta                                                                                | prolactine receptor antagonist | Epithelial ovarian cancer             | I  | recruiting                                                                                                                                | NCT02534922                      |
| LFA102                                                                                  | monoclonal antibody            | breast and prostate cancer            | I  | completed, no results published                                                                                                           | NCT01338831                      |
| <b>Subcategory 3. Targets in preclinical <i>in vitro</i> and <i>in vivo</i> studies</b> |                                |                                       |    |                                                                                                                                           |                                  |
| <b>CTSE, rank 8</b>                                                                     |                                |                                       |    |                                                                                                                                           |                                  |
| Cathepsin E-activatable 5-ALA prodrug                                                   | photo dynamic therapy          | in vivo - mouse PDA cells             |    | Effectively targeting and killing cancer cells that express CTSE                                                                          | Abd-Elgaliel <i>et al</i> , 2013 |
| <b>GGT5, rank 10</b>                                                                    |                                |                                       |    |                                                                                                                                           |                                  |
| GSAO (glutathione-S-conjugate activated by $\gamma$ GT cleavage)                        | prodrug                        | in vivo - PDA mouse model             |    | Tumor $\gamma$ GT activity positively correlated with GSAO-mediated inhibition of pancreatic tumor angiogenesis and tumor growth in mice. | Ramsay <i>et al</i> , 2014       |
| <b>GJB3, rank 18</b>                                                                    |                                |                                       |    |                                                                                                                                           |                                  |
| Carbenoxolone                                                                           | gap junction blocker           | in vitro - Pancreatic stellate cells  |    | Carbenoxolone inhibited platelet-derived growth factor-BB-induced proliferation and migration                                             | Masamune <i>et al</i> , 2013     |
| <b>TNK2, rank 73</b>                                                                    |                                |                                       |    |                                                                                                                                           |                                  |

|                                                                   |                              |                                                        |  |                                                                                                                                                                                                                   |                              |
|-------------------------------------------------------------------|------------------------------|--------------------------------------------------------|--|-------------------------------------------------------------------------------------------------------------------------------------------------------------------------------------------------------------------|------------------------------|
| AIM-100<br>pyrazolopyrimidine<br>derivative 2b<br>ALK inhibitor 5 | TNK2 inhibitors              | in vitro - prostate<br>cancer cells                    |  | AIM-100<br>treatment is<br>leading to cell<br>cycle arrest in<br>the G1 phase<br>causing<br>significant<br>decrease in<br>the<br>proliferation of<br>pancreatic<br>cancer cells<br>and induction<br>of apoptosis. | Mahajan <i>et al</i> , 2012  |
| (R)-9bMS                                                          | small-molecule<br>inhibitor  | triple negative breast<br>cancer (TNBC)                |  | In vitro<br>inhibition<br>significantly<br>compromised<br>TNBC<br>proliferation                                                                                                                                   | Wu <i>et al</i> , 2017       |
| <b>NPY1R, rank 92</b>                                             |                              |                                                        |  |                                                                                                                                                                                                                   |                              |
| BIBP3226                                                          | peptide-drug<br>conjugate    | in vitro -<br>neuroblastoma cells                      |  | The active<br>compound<br>BIBP3226 is<br>able to release<br>the drug<br>intracellular                                                                                                                             | Langer <i>et al</i> , 2001   |
| <b>TRIO, rank 107</b>                                             |                              |                                                        |  |                                                                                                                                                                                                                   |                              |
| TRIP-E32G                                                         | peptide aptamer              | In vivo - NIH 3T3<br>cells                             |  | TRIP-E32G<br>reduces the<br>formation of<br>TRIO-induced<br>tumors.                                                                                                                                               | Bouquier <i>et al</i> , 2009 |
| <b>GPER, rank 118</b>                                             |                              |                                                        |  |                                                                                                                                                                                                                   |                              |
| Gefitinib                                                         | Tyrosine Kinase<br>inhibitor | In vitro – Triple-<br>negative breast<br>cancers cells |  | Reduction of<br>GPER<br>expression is a<br>promising<br>therapeutic<br>approach for<br>TNBC                                                                                                                       | Girgert <i>et al</i> , 2017  |

|                           |                          |                                             |  |                                                                                                                                                                                                                            |                               |
|---------------------------|--------------------------|---------------------------------------------|--|----------------------------------------------------------------------------------------------------------------------------------------------------------------------------------------------------------------------------|-------------------------------|
| agonist G-1               | GPER-receptor-agonist    | In vitro – nonsmall cell lung cancer cells  |  | G-1 treatment rapidly decreased the phosphorylation, nuclear translocation, and promoter activities of NF- $\kappa$ B, which will help to better understand the roles and mechanisms of GPER as a potential therapy target | Zhu <i>et al</i> , 2016       |
| <b>ADAM18, rank 141</b>   |                          |                                             |  |                                                                                                                                                                                                                            |                               |
| BK-1361                   | ADAM8 inhibitor          | in vitro - PDA cells                        |  | BK-1361 decreased tumour burden and metastasis of implanted pancreatic tumour cells in mice                                                                                                                                | Schlomann <i>et al</i> , 2015 |
| <b>CDC42BPA, rank 142</b> |                          |                                             |  |                                                                                                                                                                                                                            |                               |
| DJ4                       | small molecule inhibitor | in vitro - (PDA) cells                      |  | DJ4 treatment significantly blocked stress fiber formation and inhibited migration and invasion of multiple cancer cell lines                                                                                              | Kale <i>et al</i> , 2014      |
| <b>PRKCi, rank 161</b>    |                          |                                             |  |                                                                                                                                                                                                                            |                               |
| aPKC-PSP                  | pseudosubstrate peptide  | In vivo -glioblastoma Stem-like cells (GSC) |  | Targeting PKC $\iota$ in the context of Notch signaling could be an effective way of attacking the GSC population in GBM                                                                                                   | Phillips <i>et al</i> , 2016  |
| SULF1, rank 180           |                          |                                             |  |                                                                                                                                                                                                                            |                               |



|       |                     |                      |  |                                                                                                                                                  |                              |
|-------|---------------------|----------------------|--|--------------------------------------------------------------------------------------------------------------------------------------------------|------------------------------|
| IQ2-S | radioactive prodrug | in vitro - PDA cells |  | Quinazolinone-based radiopharmaceuticals can lead to the development of a novel noninvasive approach for imaging and treating pancreatic cancer. | Pospisil <i>et al</i> , 2012 |
|-------|---------------------|----------------------|--|--------------------------------------------------------------------------------------------------------------------------------------------------|------------------------------|

**S100P, rank 188**

|          |                       |                     |  |                                                                                                          |                              |
|----------|-----------------------|---------------------|--|----------------------------------------------------------------------------------------------------------|------------------------------|
| cromolyn | cromolyn analog, C5OH | in vivo - PDA mouse |  | C5OH blocked the S100P-mediated growth and antiapoptotic effect in PDA and improved the animal survival. | Arumugam <i>et al</i> , 2013 |
|----------|-----------------------|---------------------|--|----------------------------------------------------------------------------------------------------------|------------------------------|

|     |                |                                            |  |                                                                                                                                     |                            |
|-----|----------------|--------------------------------------------|--|-------------------------------------------------------------------------------------------------------------------------------------|----------------------------|
| 2H8 | S100P antibody | in vivo - mouse - P <sub>x</sub> PC3 cells |  | 2H8 antibody decreased tumor growth and liver metastasis formation in a subcutaneous and orthotopic B <sub>x</sub> PC3 tumor model. | Dakhel <i>et al</i> , 2014 |
|-----|----------------|--------------------------------------------|--|-------------------------------------------------------------------------------------------------------------------------------------|----------------------------|

**Subcategory 4. Suggested as potential targets**

|  | Cancer type | Study type |  | Conclusion stu | Reference |
|--|-------------|------------|--|----------------|-----------|
|--|-------------|------------|--|----------------|-----------|

**TMPRSS4, rank 9**

|  |                                    |                                                                                    |  |                              |                              |
|--|------------------------------------|------------------------------------------------------------------------------------|--|------------------------------|------------------------------|
|  | breast cancer tissue               | IHC                                                                                |  | Prognostic marker            | Liang <i>et al</i> , 2013    |
|  | Non-small cell lung cancer (NSCLC) | In vitro treatment with demethylating agent significantly increased TMPRSS4 levels |  | Potential therapeutic target | Villalba <i>et al</i> , 2016 |
|  | Gastric cancer                     | Upregulation of TMPRSS4 enhances the invasiveness of gastric cancer cells          |  | Potential therapeutic target | Jin <i>et al</i> , 2016      |

**FXD3, rank 16**

|                         |                                               |                                                 |  |                                                                                                                                       |                                 |
|-------------------------|-----------------------------------------------|-------------------------------------------------|--|---------------------------------------------------------------------------------------------------------------------------------------|---------------------------------|
|                         | Breast cancer                                 | Suppression of FXYD3 by transfection with siRNA |  | Overexpression of FXYD3 may be a marker of resistance to cancer treatments and a potentially important therapeutic target.            | Liu <i>et al</i> , 2016a        |
| <b>CPB1, rank 26</b>    |                                               |                                                 |  |                                                                                                                                       |                                 |
|                         | Metastasis in Low Grade Breast Cancer samples | IHC                                             |  | Biomarker                                                                                                                             | Bouchal <i>et al</i> , 2015     |
| <b>PLA2G16, rank 29</b> |                                               |                                                 |  |                                                                                                                                       |                                 |
|                         | Osteosarcoma                                  | In vitro and in vivo functional analyses        |  | Potential therapeutic target                                                                                                          | Li <i>et al</i> , 2016          |
| <b>MAP4K4, rank 30</b>  |                                               |                                                 |  |                                                                                                                                       |                                 |
|                         | Gastric cancer                                | In vitro silencing of MAP4K4 by shRNA           |  | Potential therapeutic strategy                                                                                                        | Liu <i>et al</i> , 2016b        |
| <b>CBS, rank 42</b>     |                                               |                                                 |  |                                                                                                                                       |                                 |
|                         | in vitro - mouse                              | CBS silencing                                   |  | CBS silencing resulted in reduced tumor cells proliferation, blood vessels formation and lipid content.                               | Chakraborty <i>et al</i> , 2015 |
|                         | Colon cancer                                  | In vivo - xenograft                             |  | Benserazide inhibits CBS activity and suppresses colon cancer cell proliferation and bioenergetics in vitro, and tumor growth in vivo | Druzhyzna <i>et al</i> , 2016   |
| <b>GPRC5A, rank 70</b>  |                                               |                                                 |  |                                                                                                                                       |                                 |
|                         | colon cancer samples                          | IHC                                             |  | Prognostic biomarker                                                                                                                  | Zougman <i>et al</i> , 2013     |
|                         | oral squamous cell carcinoma                  | IHC                                             |  | Prognostic biomarker                                                                                                                  | Liu <i>et al</i> , 2013         |
|                         | gastric cancer samples                        | mRNA expression levels                          |  | Prognostic biomarker                                                                                                                  | Liu <i>et al</i> , 2015         |

|                       |                         |                                           |  |                                                                                                                                                                                  |                              |
|-----------------------|-------------------------|-------------------------------------------|--|----------------------------------------------------------------------------------------------------------------------------------------------------------------------------------|------------------------------|
|                       | PDAC cells              | siRNA                                     |  | Suppression of GPRC5a results in decreased cell growth, proliferation and migration                                                                                              | Jahny <i>et al</i> , 2017    |
|                       | breast cancer cell line | siRNA                                     |  | Transfection of siRNA suppressed RAI3 mRNA and growth of the cancer cells.                                                                                                       | Nagahata <i>et al</i> , 2005 |
| <b>KLK10, rank 79</b> |                         |                                           |  |                                                                                                                                                                                  |                              |
|                       | Breast cancer           | RNA-Sequencing analysis                   |  | Predictive biomarker for trastuzumab resistance and potential therapeutic target for reversing trastuzumab resistance                                                            | Wang <i>et al</i> , 2016     |
| <b>COPS5, rank 93</b> |                         |                                           |  |                                                                                                                                                                                  |                              |
|                       | Breast cancer           | Integrated genomic and functional studies |  | COPS5 overexpression causes tamoxifen-resistance in preclinical breast cancer models in vitro and in vivo > potential therapeutic approach for endocrine-resistant breast cancer | Lu <i>et al</i> , 2016       |
| <b>GTSE1, rank 97</b> |                         |                                           |  |                                                                                                                                                                                  |                              |
|                       | Gastric cancer cells    | shRNA GTSE1 knockout                      |  | Biomarker. Potential therapeutical target.                                                                                                                                       | Deeb <i>et al</i> , 2014     |

|                        |                                |                         |  |                                                                                                               |                              |
|------------------------|--------------------------------|-------------------------|--|---------------------------------------------------------------------------------------------------------------|------------------------------|
|                        | hepatocellular carcinoma cells | shRNA GTSE1 silencing   |  | GTSE1 is aberrantly overexpressed in HCC cell lines and cancerous tissues > Potential therapeutic target      | Guo <i>et al</i> , 2016      |
| <b>KMT2B, rank 104</b> |                                |                         |  |                                                                                                               |                              |
|                        | Breast cancer cells            | siRNA knockdown         |  | Inhibition of IL-20 and KMT2B may have therapeutic benefits in ER $\alpha$ -positive breast cancer            | Su <i>et al</i> , 2016       |
| <b>SPN, rank 160</b>   |                                |                         |  |                                                                                                               |                              |
|                        | HPB-ALL lymphoma               | UN1 monoclonal antibody |  | UN1 mAb is leading to natural killer-mediated cytotoxicity causing growth inhibition                          | Tuccillo <i>et al</i> , 2014 |
|                        | mouse model - breast cancer    | siRNA SPN knockdown     |  | Reduction in primary tumour growth in vivo                                                                    | Fu <i>et al</i> , 2014       |
| <b>RAMP1, rank 166</b> |                                |                         |  |                                                                                                               |                              |
|                        | prostate cancer                |                         |  | Potential molecular target                                                                                    | Logan <i>et al</i> , 2013    |
| <b>HNF1A, rank 167</b> |                                |                         |  |                                                                                                               |                              |
|                        | PDA tissue and cells           | siRNA HNF1A knockdown   |  | siRNA HNF1A knockdown reduced apoptosis in pancreatic cancer cell lines. HNF1A is a possible tumor suppressor | Luo <i>et al</i> , 2015      |
| <b>MYBL2, rank 181</b> |                                |                         |  |                                                                                                               |                              |

|                                                |        |  |                                                                                                                                        |                         |
|------------------------------------------------|--------|--|----------------------------------------------------------------------------------------------------------------------------------------|-------------------------|
| In vivo - mouse<br>Breast cancer<br>xenografts | Si-RNA |  | B-myb plays a<br>role in cell<br>cycle<br>progression<br>and<br>tumorigenesis.<br>Potential<br>diagnostic /<br>therapeutical<br>target | Tao <i>et al</i> , 2014 |
|------------------------------------------------|--------|--|----------------------------------------------------------------------------------------------------------------------------------------|-------------------------|

|                                                                                                  |                                                             |                                                     |                                                                                                                                                                                         |                                 |
|--------------------------------------------------------------------------------------------------|-------------------------------------------------------------|-----------------------------------------------------|-----------------------------------------------------------------------------------------------------------------------------------------------------------------------------------------|---------------------------------|
| (111)In-labeled PAM4                                                                             | <i>phase I clinical trial</i> <u>PET-scan</u>               | pancreatic cancer                                   | radiolabeled PAM4 selectively targets pancreatic cancer in both the experimental animal model and clinical studies.                                                                     | Gold <i>et al</i> , 2001        |
| [64Cu]-DOTA-PR81                                                                                 | <i>in vivo - mouse</i> <u>PET-scan</u>                      | breast cancer xenografts                            | The biodistribution and scintigraphy studies showed the accumulation of 64Cu-DOTA-PR81 at the site of tumors with high sensitivity and specificity for MUC1 compared to control probes. | Alirezapour <i>et al</i> , 2016 |
| Ab-FL-Cy5.5                                                                                      | <i>in vivo - mouse</i> <u>dual labelled optical imaging</u> | ovarian cancer xenografts                           | Ab-FL-Cy5.5 probe can be used for <i>in vivo</i> imaging of MUC1 expressing tumors                                                                                                      | Zhang <i>et al</i> , 2015       |
| <b>NPY1R, rank 92</b>                                                                            |                                                             |                                                     |                                                                                                                                                                                         |                                 |
| [Lys(M/DOTA)4] BVD15                                                                             | <i>in vitro</i>                                             | Breast cancer cells                                 | [Lys(DOTA)4]BVD15 is a potent and specific ligand for NPY1R                                                                                                                             | Zhang <i>et al</i> , 2016       |
| <b>MSLN, rank 110</b>                                                                            |                                                             |                                                     |                                                                                                                                                                                         |                                 |
| 89Zr-MMOT0530A+E3 6:I4089Zr-MMOT0530A                                                            | <i>phase I clinical trial</i> <u>PET-scan</u>               | pancreatic cancer and ovarian cancer                | 89Zr-MMOT0530A-PET pancreatic and ovarian cancer lesions as well as antibody biodistribution could be visualized.                                                                       | Lamberts <i>et al</i> , 2015b   |
| 64Cu-NOTA-amatuximab                                                                             | <i>in vivo - mouse</i> <u>PET-scan</u>                      | epithelial carcinoma cells                          | 64Cu-NOTA-amatuximab enables quantification of tumor and major organ uptake values using PET scanning                                                                                   | Lee <i>et al</i> , 2015         |
| Indium-CHX-A amatuximab                                                                          | <i>phase I clinical trial</i> <u>SPECT-scan</u>             | mesothelin overexpressing tumors                    | 111In-amatuximab localizes to mesothelin expressing cancers with a higher uptake in mesothelioma than pancreatic cancer.                                                                | NCT01521325                     |
| Me-F127COOH-QD nanomicelles                                                                      | <i>in vivo - mouse</i>                                      | pancreatic cancer xenografts                        | anti-mesothelin antibody conjugated carboxylated F127 nanomicelles accumulated specifically at the pancreatic tumor site 15 min after intravenous injection with low toxicity           | Ding <i>et al</i> , 2011        |
| anti-mesothelin antibody-conjugated PEGylated liposomal ultrasmall superparamagnetic iron oxides | <i>in vivo - mouse</i> <u>MRI</u>                           | pancreatic cancer xenografts                        | M-PLDUs specifically targets MSLN and could well improve the therapeutic efficacy of DOX chemotherapy <i>in vivo</i> and could be visualized by MRI <i>in vivo</i> .                    | Deng <i>et al</i> , 2012        |
| <b>GPER, rank 118</b>                                                                            |                                                             |                                                     |                                                                                                                                                                                         |                                 |
| 99mTc(I)-labeled nonsteroidal GPER-specific ligands                                              | <i>in vivo - mouse</i> <u>SPECT-scan</u>                    | human endometrial and breast cancer cell xenografts | 99mTc-labeled-GPER-specific radioligands are tumor specific and could be clearly visualized using SPECT-scan                                                                            | Nayak <i>et al</i> , 2014       |

|    |                  |               |                               |   |   |   |                                                    |
|----|------------------|---------------|-------------------------------|---|---|---|----------------------------------------------------|
| 42 | CBS              | intracellular | Lysase                        |   |   | ● |                                                    |
| 43 | UGT1A1 /// UGT1A | intracellular | Transferase                   |   |   | ● |                                                    |
| 44 | GRB7             | cell membrane | Adaptor protein               | ● |   |   | Tanaka <i>et al</i> , 2006                         |
| 45 | TREM2            | cell membrane | Receptor                      |   | ● |   | Yang <i>et al</i> , 2014                           |
| 46 | IGFBP5           | extracellular | growth factor binding protein | ● |   |   | Johnson <i>et al</i> , 2006; Sarah K Johnson, 2009 |
| 47 | H2BFS            | intracellular | unknown                       |   |   | ● |                                                    |
| 48 | GSTM3            | intracellular | Transferase                   |   | ● |   | Meding <i>et al</i> , 2012                         |
| 49 | RTP4             | intracellular | Transporter                   |   |   | ● |                                                    |
| 50 | RUNX1T1          | intracellular | Transcription factor          |   |   | ● |                                                    |

Abbreviation: GPRC, G-protein coupled receptor. SDR, Short Chain Dehydrogenase/Reductase

\* Reduced protein expression level in cancer

| Supplemental Table 4 – Targets for pancreatic cancer imaging                                  |                                                                                   |                                                                                   |                                                                                                                                                                                                                                                                           |                                  |
|-----------------------------------------------------------------------------------------------|-----------------------------------------------------------------------------------|-----------------------------------------------------------------------------------|---------------------------------------------------------------------------------------------------------------------------------------------------------------------------------------------------------------------------------------------------------------------------|----------------------------------|
| Tracer name                                                                                   | Study type                                                                        | Cancer type                                                                       | Conclusion                                                                                                                                                                                                                                                                | Reference                        |
| <b>THY1, rank 1</b>                                                                           |                                                                                   |                                                                                   |                                                                                                                                                                                                                                                                           |                                  |
| Thy1-Targeted Microbubbles (MBThy1)                                                           | <i>in vivo - mouse</i><br><u>ultrasound</u><br><u>molecular</u><br><u>imaging</u> | pancreatic cancer xenografts                                                      | Thy1 targeted ultrasound molecular imaging is feasible                                                                                                                                                                                                                    | Foygel <i>et al</i> , 2013       |
| <b>CTSE, rank 8</b>                                                                           |                                                                                   |                                                                                   |                                                                                                                                                                                                                                                                           |                                  |
| CTSE-activatable optical molecular probe                                                      | <i>in vivo - mouse</i><br><u>optical imaging</u>                                  | pancreatic cancer xenografts                                                      | CTSE-activatable probe can be detected by confocal laser endomicroscopy (CLE)                                                                                                                                                                                             | Li <i>et al</i> , 2014           |
| ritonavir tetramethyl-BODIPY (RIT-TMB )                                                       | <i>in vivo - mouse</i><br><u>optical imaging</u>                                  | pancreatic cancer orthotopic tumors                                               | RIT-TMB imaging is feasible <i>in vitro</i> and demonstrated good co- localization with CTSE in both human and mouse PDA samples                                                                                                                                          | Keliher <i>et al</i> , 2013      |
| CTSE-activatable optical molecular probe                                                      | <i>in vivo - mouse</i><br><u>optical imaging</u>                                  | pancreatic cancer xenografts                                                      | The Cath E-activatable probe was able to highlight the Cath E-positive tumors; control imaging probe confirmed the superior selectivity and sensitivity                                                                                                                   | Abd-Elgaliel <i>et al</i> , 2011 |
| <b>GGT5, rank 10</b>                                                                          |                                                                                   |                                                                                   |                                                                                                                                                                                                                                                                           |                                  |
| gGlu-HMRG                                                                                     | <i>ex vivo</i><br><u>optical imaging</u><br><u>EUS-FNA</u>                        | Human pancreatic samples                                                          | gGlu-HMRG did not clearly differentiate pancreatic tumor tissues from normal pancreatic ones because GGT activity was not different between tumor cells and normal cells.                                                                                                 |                                  |
| gGlu-HMRG                                                                                     | <i>ex vivo</i> breast cancer samples                                              | Breast cancer                                                                     | fluorescence derived from cleavage of gGlu-HMRG allowed easy discrimination of breast tumors from normal mammary gland tissues, with 92% sensitivity and 94% specificity.                                                                                                 | Ueo <i>et al</i> , 2015          |
| BODIPY-GSH                                                                                    | <i>In vitro</i>                                                                   | Ovarian cancer cells                                                              | FIST probes enable monitoring the GGT activity in living cells, which showed differentiation between ovarian cancer cells and normal cells.                                                                                                                               | Wang <i>et al</i> , 2015         |
| gGlu-HMRG                                                                                     | <i>Ex vivo</i>                                                                    | colon carcinoma samples                                                           | Topically spraying gGlu-HMRG enabled rapid and selective fluorescent imaging of colorectal tumors owing to the upregulated GGT activity in cancer cells.                                                                                                                  | Sato <i>et al</i> , 2015         |
| gGlu-HMRG                                                                                     | <i>In vivo - mouse</i>                                                            | Colon cancer mouse model                                                          | Fluorescence endoscopic detection of colon cancer was feasible. All fluorescent lesions contained cancer or high-grade dysplasia, all non-fluorescent lesions contained low-grade dysplasia or benign tissue.                                                             | Mitsunaga <i>et al</i> , 2013    |
| gGlu-HMRG                                                                                     | <i>In vivo - mouse</i>                                                            | disseminated peritoneal ovarian cancer model                                      | Activation of gGlu-HMRG occurred within 1 min of topically spraying the tumor, creating high signal contrast between the tumor and the background.                                                                                                                        | Urano <i>et al</i> , 2011        |
| <b>MUC1, rank 41</b>                                                                          |                                                                                   |                                                                                   |                                                                                                                                                                                                                                                                           |                                  |
| aptamer-PEG-near- infrared fluorescence probe (APT-PEG-MPA)                                   | <i>in vivo - mouse</i><br><u>optical imaging</u>                                  | breast cancer, non-small cell lung carcinoma, hepatocellular carcinoma xenografts | MUC1 aptamer-based NIR fluorescence probe has a high tumor-targeting ability and low accumulation in normal tissue                                                                                                                                                        | Chen <i>et al</i> , 2015         |
| MN-EPPT (iron oxide nanoparticles (MN), labeled with Cy5.5 dye conjugated to peptides (EPPT)) | <i>in vivo - mouse</i><br><u>optical</u><br><u>imaging/MRI</u>                    | breast cancer transgenic mouse model                                              | changes in uMUC-1 expression during tumor development and therapeutic intervention could be monitored non-invasively using molecular imaging approach with the uMUC-1-specific contrast agent (MN-EPPT) detectable by magnetic resonance and fluorescence optical imaging | Ghosh <i>et al</i> , 2013        |
